# Supplementary material for: Revisiting five decades of 234 Th data: a comprehensive global oceanic compilation
Source: Copernicus journal article supplement (doi:10.5194/essd-2021-259), 2021-10-01

## Supplementary Material

**Table S1. Fields (rows) in the “metadata” table.**

| FIELD NAME                    | FIELD TYPE        | FIELD DESCRIPTION                                                                                                                                                                                     |
|-------------------------------|-------------------|-------------------------------------------------------------------------------------------------------------------------------------------------------------------------------------------------------|
| Reference_USE                 | Integer           | Unique integer record ID number (format 0000).                                                                                                                                                        |
| INFO                          | <i>Header</i>     | <i>Header</i>                                                                                                                                                                                         |
| Project_Name                  | Text              | Name of the project(s)/program(s) in which the sampling(s) cruise(s) was(were) involved (if applicable). If several cruises compiled, indicate individually. If none, -999.                           |
| Several_cruises               | Number/Short text | YES/NO.                                                                                                                                                                                               |
| Cruise_ID                     | Number/Short text | Cruise(s) name or number(s) during which data compiled were collected. If several cruises compiled, indicate individually. If unknown, -999.                                                          |
| Leg_details                   | Number/Short text | Leg details of the sampling cruise(s) (if applicable). If several cruises compiled, report individually. If unknown, -999.                                                                            |
| Ship                          | Short text        | Research vessel(s) used for the sampling cruise(s). If several cruises compiled, indicate individually. If unknown, -999.                                                                             |
| Chief_Scientist               | Short text        | Chief scientist(s) of the sampling cruise(s). If several cruises compiled, indicate individually. If unknown, -999.                                                                                   |
| Ocean                         | Short text        | Sampling ocean. If unknown, -999.                                                                                                                                                                     |
| Region                        | Short text        | Sampling region. If sea sampled, indicate here. If unknown, -999.                                                                                                                                     |
| Latitude_max_decimal_degrees  | Number            | Maximum north latitude in decimal degrees (from - 90 to +90).                                                                                                                                         |
| Latitude_min_decimal_degrees  | Number            | Minimum north latitude in decimal degrees (from - 90 to +90).                                                                                                                                         |
| Longitude_max_decimal_degrees | Number            | Maximum east longitude in decimal degrees (from -180 to +180).                                                                                                                                        |
| Longitude_min_decimal_degrees | Number            | Minimum east longitude in decimal degrees (from -180 to +180).                                                                                                                                        |
| Bottom_depth_max(m)           | Number            | Maximum bottom depth of the locations sampled. If unknown, -999.                                                                                                                                      |
| Period                        | Date - Date       | Dates interval between first and last <sup>234</sup> Th sampling (YYY-MM-DD format).                                                                                                                  |
| Start_Date                    | Date              | Date of first <sup>234</sup> Th sampling (YYY-MM-DD format).                                                                                                                                          |
| End_Date                      | Date              | Date of last <sup>234</sup> Th sampling (YYY-MM-DD format).                                                                                                                                           |
| bloom_stage                   | Short text        | Bloom stage at the sampling moment. Options: pre-bloom, bloom, post-bloom, no bloom. If several cruises compiled, indicate individually. If unknown, -999.                                            |
| DATA                          | <i>Header</i>     | <i>Header</i>                                                                                                                                                                                         |
| Number_of_stations            | Integer           | Number of stations sample. If some station corresponds to a long-term, high-frequency observations at fixed locations in the open ocean, indicated as “time-series”. If some stations were reoccupied |

|                                             |            |                                                                                                                                                                                                                                                                            |
|---------------------------------------------|------------|----------------------------------------------------------------------------------------------------------------------------------------------------------------------------------------------------------------------------------------------------------------------------|
| $^{238}\text{U}$                            | Short text | during sampling, indicated as “reoccupied”.                                                                                                                                                                                                                                |
| Total_ $^{234}\text{Th}$                    | Short text | Total number of $^{238}\text{U}$ concentration compiled in the dataset.                                                                                                                                                                                                    |
| Number_of_datapoints_Total                  | Integer    | YES/NO.                                                                                                                                                                                                                                                                    |
| Dissolved_ $^{234}\text{Th}$                | Short text | Total number of total $^{234}\text{Th}$ concentration compiled in the dataset.                                                                                                                                                                                             |
| Number_of_datapoints_Dissolved              | Integer    | YES/NO.                                                                                                                                                                                                                                                                    |
| Particulate_ $^{234}\text{Th}$              | Short text | Total number of dissolved $^{234}\text{Th}$ concentration compiled in the dataset.                                                                                                                                                                                         |
| Number_of_datapoints_Part particulate       | Integer    | YES/NO.                                                                                                                                                                                                                                                                    |
| Size_class                                  | Short text | Total number of particulate $^{234}\text{Th}$ concentration compiled in the dataset.                                                                                                                                                                                       |
|                                             |            | Size class(es) for particulate $^{234}\text{Th}$ sampling. Maximum of two sizes reported (denoted as “small” and “large”, preferably 1-53 $\mu\text{m}$ and < 53 $\mu\text{m}$ ). If more than 2 sizes available, indicate the extra sizes not complied. If unknown, -999. |
| POC: $^{234}\text{Th}$ _ratio               | Short text | YES/NO.                                                                                                                                                                                                                                                                    |
| Number_of_datapoints_POC: $^{234}\text{Th}$ | Integer    | Total number of POC: $^{234}\text{Th}$ ratios values compiled in the dataset.                                                                                                                                                                                              |
| PON: $^{234}\text{Th}$ _ratio               | Short text | YES/NO.                                                                                                                                                                                                                                                                    |
| Number_of_datapoints_PON: $^{234}\text{Th}$ | Integer    | Total number of PON: $^{234}\text{Th}$ ratios values compiled in the dataset.                                                                                                                                                                                              |
| METHODS                                     | Header     | Header                                                                                                                                                                                                                                                                     |
| $^{238}\text{U}$ _method                    | Text       | Sampling method for the particulate $^{234}\text{Th}$ fraction. If unknown, -999.                                                                                                                                                                                          |
| Total_ $^{234}\text{Th}$ _method            | Text       | Sampling method for the total $^{234}\text{Th}$ fraction. If unknown, -999.                                                                                                                                                                                                |
| Dissolved_ $^{234}\text{Th}$ _method        | Text       | Sampling method for the dissolved $^{234}\text{Th}$ fraction. If unknown, -999.                                                                                                                                                                                            |
| Particulate_ $^{234}\text{Th}$ _method      | Text       | Sampling method for the particulate $^{234}\text{Th}$ fraction. If unknown, -999.                                                                                                                                                                                          |
| SS/NSS                                      | Short text | Options: i) SS, ii) NSS or iii) both. If unknown, -999.                                                                                                                                                                                                                    |
| comments                                    | Text       | Additional comments of interest regarding the dataset compiled. If none, -NO.                                                                                                                                                                                              |
| ADDITIONAL_DATA                             | Header     | Header                                                                                                                                                                                                                                                                     |
| $^{234}\text{Th}$ _underway                 | Short text | YES/NO.                                                                                                                                                                                                                                                                    |
| sediment_traps                              | Short text | Sediment trap type (if yes)/NO.                                                                                                                                                                                                                                            |
| $^{210}\text{Pb}$ - $^{210}\text{Po}$       | Short text | YES/NO.                                                                                                                                                                                                                                                                    |
| CHN                                         | Short text | YES/NO.                                                                                                                                                                                                                                                                    |
| additional                                  | Text       | Data type, e.g., POC: $^{234}\text{Th}$ ratios from sediment traps (if yes)/NO.                                                                                                                                                                                            |
| DATA_SOURCE                                 | Header     | Header                                                                                                                                                                                                                                                                     |
| Publication                                 | Short text | YES/NO.                                                                                                                                                                                                                                                                    |
| First_author_paper/data                     | Short text | Options: i) first author of the paper (if data reported are published in refereed journals), ii) first author of the data (if data reported are published in repositories), iii) data owner (if data reported are unpublished).                                            |

|                     |            |                                                                                                                                                                                                                                                                                                                                            |
|---------------------|------------|--------------------------------------------------------------------------------------------------------------------------------------------------------------------------------------------------------------------------------------------------------------------------------------------------------------------------------------------|
| Journal             | Short text | Options: i) journal of publication (if data reported are published in refereed journals), ii) -999 (if data reported are published in repositories), iii) “np” (if data reported are published in repositories or unpublished).                                                                                                            |
| Year                | Integer    | Options: i) year of publication (if data reported are published in refereed journals or repositories), ii) -999 (if date reported are unpublished).                                                                                                                                                                                        |
| DOI/others          | Short text | Options: i) Digital Object Identifier (DOI) of the publication or repository, if assigned, or ii) link of the data repository if data do not have a DOI associated. Otherwise, -999.                                                                                                                                                       |
| data_localization   | Short text | Details of the localization of the data. Options: i) number of table(s), and/or ii) figure(s), and/or iii) link to repository, and/or iv) personal communication from author (if so, specify author name). If none, -999.                                                                                                                  |
| data_resource       | Short text | Options: i) link to access the data (either publication or repository URL if data reported are published), sometimes this link is the same that the DOI/others link and ii) “personal communication from <i>Author Name</i> ” (if data reported are unpublished). In case of a PhD thesis, the name of the thesis and University is added. |
| Other DOI/resources | Short text | Alternative useful information or additional links. If data compiled are also reported in another publication in refereed journals, indicate here (first author, year and DOI). If none, -999.                                                                                                                                             |

**Table S2. Fields (columns) in the “data” table.**

| Field name                           | Field type        | Field description                                                                                                                                                            |
|--------------------------------------|-------------------|------------------------------------------------------------------------------------------------------------------------------------------------------------------------------|
| Cruise ID                            | Number/Short text | Cruise name or number. If none, -999.                                                                                                                                        |
| station_ID                           | Number/Short text | Station name or number. If none, -999.                                                                                                                                       |
| lat_decimal_degrees                  | Number            | North latitude in decimal degrees (from - 90 to +90). If unknown, -999.                                                                                                      |
| lon_decimal_degrees                  | Number            | East longitude in decimal degrees (from -180 to +180). If unknown, -999.                                                                                                     |
| month                                | Integer           | Month of sampling. If unknown, -999.                                                                                                                                         |
| day                                  | Integer           | Day of sampling. If unknown, -999.                                                                                                                                           |
| year                                 | Integer           | Year of sampling. If unknown, -999.                                                                                                                                          |
| DOY                                  | Integer           | Day Of Year (DOY). If unknown, -999.                                                                                                                                         |
| bottom_depth(m)                      | Number            | Station bottom depth (in m). If unknown, -999.                                                                                                                               |
| depth(m)                             | Number            | Sampling depth for <sup>234</sup> Th total and dissolved concentrations (in m). If sample single vertically integrated over a depth interval, -555.                          |
| integrated_depth(m)                  | Number            | Interval depth for <sup>234</sup> Th total and dissolved concentrations obtained as single vertically integrated samples (in m). If unknown, -999.                           |
| temperature                          | Number            | Temperature at the sampling depth (in °C). If unknown, -999.                                                                                                                 |
| salinity                             | Number            | Salinity at the sampling depth (in PSU). If unknown, -999.                                                                                                                   |
| <sup>238</sup> U(dpm/L)              | Number            | <sup>238</sup> U concentration at the sampling depth (in dpm/L). If unknown, -999.                                                                                           |
| uncert_ <sup>238</sup> U             | Number            | <sup>238</sup> U concentration uncertainty at the sampling depth (in dpm/L). If unknown, -999.                                                                               |
| total_ <sup>234</sup> Th(dpm/L)      | Number            | <sup>234</sup> Th total concentration at the sampling depth (in dpm/L). If unknown, -999.                                                                                    |
| uncert_total <sup>234</sup> Th       | Number            | <sup>234</sup> Th total concentration uncertainty at the sampling depth (in dpm/L). If unknown, -999.                                                                        |
| diss_ <sup>234</sup> Th(dpm/L)       | Number            | <sup>234</sup> Th dissolved concentration at the sampling depth (in dpm/L). If unknown, -999.                                                                                |
| uncert_diss <sup>234</sup> Th        | Number            | <sup>234</sup> Th dissolved concentration uncertainty at the sampling depth (in dpm/L). If unknown, -999.                                                                    |
| method_1                             | Short text        | Filtration sampling method for particulate <sup>234</sup> Th concentration. Options: i) Go-Flo bottle, ii) Niskin bottle, iii) filter, and iv) pump.                         |
| Depth_real_particle(m)               | Number            | Sampling depth for <sup>234</sup> Th particulate concentration with “method 1” (in m). If unknown, -999. If sample single vertically integrated over a depth interval, -555. |
| integrated_depth_real_particle(m)    | Number            | Interval depth for <sup>234</sup> Th particulate concentrations obtained as single vertically integrated samples with “method 1” (in m). If unknown, -999.                   |
| filter_size_small(um)                | Short text        | Filter size for the small fraction (preferably >1-53 μm) (in μm).                                                                                                            |
| part_ <sup>234</sup> Th_small(dpm/L) | Number            | <sup>234</sup> Th particulate concentration at the sampling depth for the small size fraction (preferably >1-53 μm) measured with “method 1” (in dpm/L).                     |
| uncert_part <sup>234</sup> Th_small  | Number            | <sup>234</sup> Th particulate concentration uncertainty at the sampling depth for the small size fraction (preferably >1-53 μm) measured with “method 1” (in dpm/L).         |
| POC_small(umol/L)                    | Number            | Particulate Organic Carbon (POC) concentration at the sampling depth for the small size fraction                                                                             |

|                                      |            |                                                                                                                                                                            |
|--------------------------------------|------------|----------------------------------------------------------------------------------------------------------------------------------------------------------------------------|
| uncert_POC_small                     | Number     | (preferably >1-53 µm) measured with “method 1” (in µmol/L).                                                                                                                |
| POC/Th_small(umol/dpm)               | Number     | Particulate Organic Caron (POC) concentration uncertainty at the sampling depth for the small size fraction (preferably >1-53 µm) measured with “method 1” (in µmol/L).    |
| uncert_POC/Th_small                  | Number     | POC to particulate <sup>234</sup> Th ratio at the sampling depth for the small size fraction (preferably >1-53 µm) measured with “method 1” (in µmol/dpm).                 |
| PON_small(umol/L)                    | Number     | POC to particulate <sup>234</sup> Th ratio uncertainty at the sampling depth for the small size fraction (preferably >1-53 µm) measured with “method 1” (in µmol/dpm).     |
| uncert_PON_small                     | Number     | Particulate Organic Nitrogen (PON) concentration at the sampling depth for the small size fraction (preferably >1-53 µm) measured with “method 1” (in µmol/L).             |
| PON/Th_small(umol/dpm)               | Number     | Particulate Organic Nitrogen (PON) concentration uncertainty at the sampling depth for the small size fraction (preferably >1-53 µm) measured with “method 1” (in µmol/L). |
| uncert_PON/Th_small                  | Number     | PON to particulate <sup>234</sup> Th ratio at the sampling depth for the small size fraction (preferably >1-53 µm) measured with “method 1” (in µmol/dpm).                 |
| filter_size_large(um)                | Short text | PON to particulate <sup>234</sup> Th ratio uncertainty at the sampling depth for the small size fraction (preferably >1-53 µm) measured with “method 1” (in µmol/dpm).     |
| part_ <sup>234</sup> Th_large(dpm/L) | Number     | Filter size for the small fraction (preferably >53 µm) (in µm).                                                                                                            |
| uncert_part <sup>234</sup> Th_large  | Number     | <sup>234</sup> Th particulate concentration at the sampling depth for the large size fraction (preferably >53 µm) measured with “method 1” (in dpm/L).                     |
| POC_large(umol/L)                    | Number     | <sup>234</sup> Th particulate concentration uncertainty at the sampling depth for the large size fraction (preferably >53 µm) measured with “method 1” (in dpm/L).         |
| uncert_POC_large                     | Number     | Particulate Organic Caron (POC) concentration at the sampling depth for the large size fraction (preferably >53 µm) measured with “method 1” (in µmol/L).                  |
| POC/Th_large(umol/dpm)               | Number     | Particulate Organic Caron (POC) concentration uncertainty at the sampling depth for the large size fraction (preferably >53 µm) measured with “method 1” (in µmol/L).      |
| uncert_POC/Th_large                  | Number     | POC to particulate <sup>234</sup> Th ratio at the sampling depth for the large size fraction (preferably >53 µm) measured with “method 1” (in µmol/dpm).                   |
| PON_large(umol/L)                    | Number     | POC to particulate <sup>234</sup> Th ratio uncertainty at the sampling depth for the large size fraction (preferably >53 µm) measured with “method 1” (in µmol/dpm).       |
| uncert_PON_large                     | Number     | Particulate Organic Nitrogen (PON) concentration at the sampling depth for the large size fraction (preferably >53 µm) measured with “method 1” (in µmol/L).               |

|                                        |            |                                                                                                                                                                                  |
|----------------------------------------|------------|----------------------------------------------------------------------------------------------------------------------------------------------------------------------------------|
| PON/Th_large(umol/dpm)                 | Number     | PON to particulate <sup>234</sup> Th ratio at the sampling depth for the large size fraction (preferably >1-53 μm) measured with “method 1” (in μmol/dpm).                       |
| uncert_PON/Th_large                    | Short text | PON to particulate <sup>234</sup> Th ratio uncertainty at the sampling depth for the large size fraction (preferably >53 μm) measured with “method 1” (in μmol/dpm).             |
| method_2                               | Number     | Sediment traps                                                                                                                                                                   |
| Depth_real_particle_trap(m)            | Number     | Sampling depth for <sup>234</sup> Th particulate concentration with sediment traps (in m). If unknown, -999. If sample single vertically integrated over a depth interval, -555. |
| integrated_depth_real_particle_trap(m) | Number     | Interval depth for <sup>234</sup> Th particulate concentrations obtained as single vertically integrated samples with sediment traps (in m). If unknown, -999.                   |
| POC/Th_trap(umol/dpm)                  | Number     | POC to particulate <sup>234</sup> Th ratio at the sampling depth for the large size fraction (preferably >53 μm) measured with sediment traps (in μmol/dpm).                     |
| uncert_POC/Th_trap                     | Number     | POC to particulate <sup>234</sup> Th ratio uncertainty at the sampling depth for the large size fraction (preferably >53 μm) measured with sediment traps (in μmol/dpm).         |
| PON/Th_trap(umol/dpm)                  | Number     | PON to particulate <sup>234</sup> Th ratio at the sampling depth for the large size fraction (preferably >53 μm) measured with sediment traps (in μmol/dpm).                     |
| uncert_PON/Th_trap                     | Number     | PON to particulate <sup>234</sup> Th ratio uncertainty at the sampling depth for the large size fraction (preferably >53 μm) measured with sediment traps (in μmol/dpm).         |

**Table S3. Summary of the ocean projects and experiments carried out during Era 3 in chronological order.**

| #  | Project name                                                                                                                    | Acronym      | Dates               | Location                                                                                                                    |
|----|---------------------------------------------------------------------------------------------------------------------------------|--------------|---------------------|-----------------------------------------------------------------------------------------------------------------------------|
| 1  | High-resolution temporal and spatial study of the Benthic biology and Geochemistry of a north-eastern Atlantic abyssal Locality | BENGAL       | 1996-1999           | Time-series station BENGAL (49.83N, 16.58W) (Atlantic Ocean)                                                                |
| 2  | Mediterranean Targeted Project II-Mass Transfer and Ecosystem Response                                                          | MTP II-MATER | March-May 1997      | Gulf of Lions (Atlantic Ocean)                                                                                              |
| 3  | Biogeochemical Transport of Matter and Energy in the Deep Sea                                                                   | BIGSET       | 1997-1998           | Arabian Sea                                                                                                                 |
| 4  | EC ARMARA Project                                                                                                               | EC ARMARA    | 1998                | Atlantic Ocean                                                                                                              |
| 5  | Arctic Light and Heat                                                                                                           | ALV          | 1999                | Arctic Ocean                                                                                                                |
| 6  | Biogeochemical Transport of Matter and Energy in the Deep Sea                                                                   | BIGSET       | 2000                | PAP Site (Atlantic Ocean)                                                                                                   |
| 7  | European Iron Enrichment Experiment in the Southern Ocean                                                                       | EisenEx*     | 2000                | Southern Ocean                                                                                                              |
| 8  | CARbon Transfer, Transport and Transformation                                                                                   | CAR-TTT      | 2000                | South China Sea                                                                                                             |
| 9  | Subarctic Pacific Iron Experiment for Ecosystem Dynamics Study                                                                  | SEEDS*       | 2001-2004           | Arctic Ocean                                                                                                                |
| 10 | Southern Ocean Iron Experiment                                                                                                  | SOFeX*       | 2002                | south of New Zeland (Southern Ocean)                                                                                        |
| 11 | Second Chinese Arctic Expedition                                                                                                | -            | 2003                | Arctic Ocean                                                                                                                |
| 12 | Carbon flux and ecosystem feedback in the northern Barents Sea in an era of climate change                                      | CABANERA     | 2003                | Barents Sea (Atlantic Ocean)                                                                                                |
| 13 | Canadian Arctic Shelf Exchange Study                                                                                            | CASES        | 2003                | Arctic Ocean                                                                                                                |
| 14 | Production and Export of Carbon: control by Heterotrophs at short time scale                                                    | PECHE        | April 2003-Oct 2004 | Mediterranean Sea (Atlantic Ocean)                                                                                          |
| 15 | VERTical Transport In the Global Ocean                                                                                          | VERTIGO      | 2003-2007           | ALOHA station & a new moored time-series site in the subarctic NW Pacific (Japanese site K2; 47N 160E) site (Pacific Ocean) |
| 16 | CROZet natural iron bloom and EXport experiment                                                                                 | CROZEX       | Dec 2004-Jan 2005   | Southern Indian Ocean and the Southern Ocean in the region of the Crozet Plateau                                            |
| 17 | Eddies Dynamics, Mixing, Export, and Species composition                                                                        | EDDIES       | 2004-2005           | Sargasso Sea (Atlantic Ocean)                                                                                               |
| 18 | Kerguelen Ocean and Plateau compared Study                                                                                      | KEOPS        | Jan-Feb 2005        | Southern Ocean                                                                                                              |
| 19 | Blue Water Zone project                                                                                                         | BWZ          | 2005-2008           | Drake Passage (Southern Ocean )                                                                                             |
| 20 | Plankton Community Structure and Iron Distribution                                                                              | -            | 2006                | Drake Passage (Southern Ocean )                                                                                             |

\*compiled in the FeSynth initiative (see Sec 4.2

Figure S1 Annual (a) and seasonal (b) distribution of field surveys including  $^{234}\text{Th}$  sampling since the first reported sampling in 1967 separated by Northern and Southern Hemisphere (NH and SH respectively). Dotted lines indicate tipping points in the  $^{234}\text{Th}$  timeline.

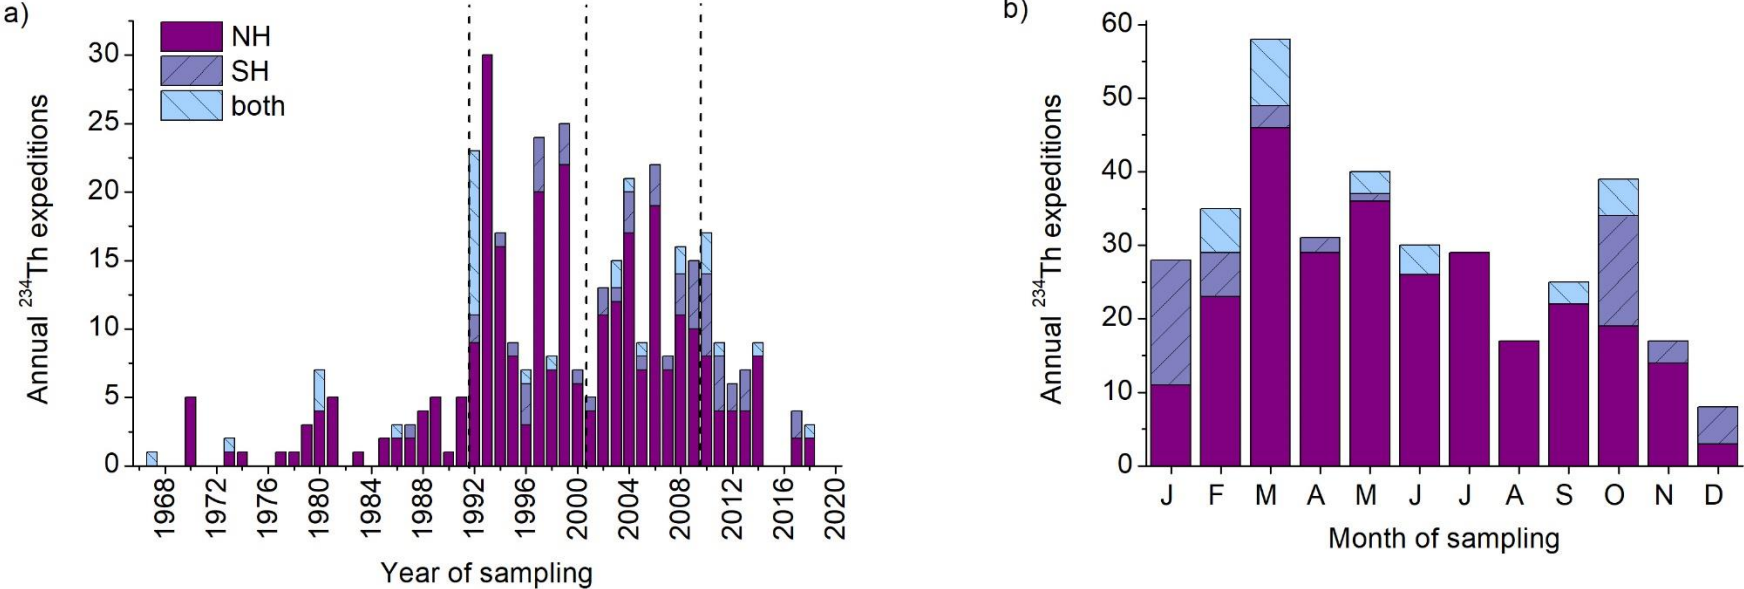



Figure S2 Time distribution of annual  $^{234}\text{Th}$  data points measurements since the first reported sampling in 1967 separated by ocean as follows: i) Atlantic, ii) Arctic, iii) Indian, iv) Pacific and v) Southern, with and additional category for vi) “Others”, which includes rivers, lakes and bays. Dotted lines indicate tipping points in the  $^{234}\text{Th}$  timeline.

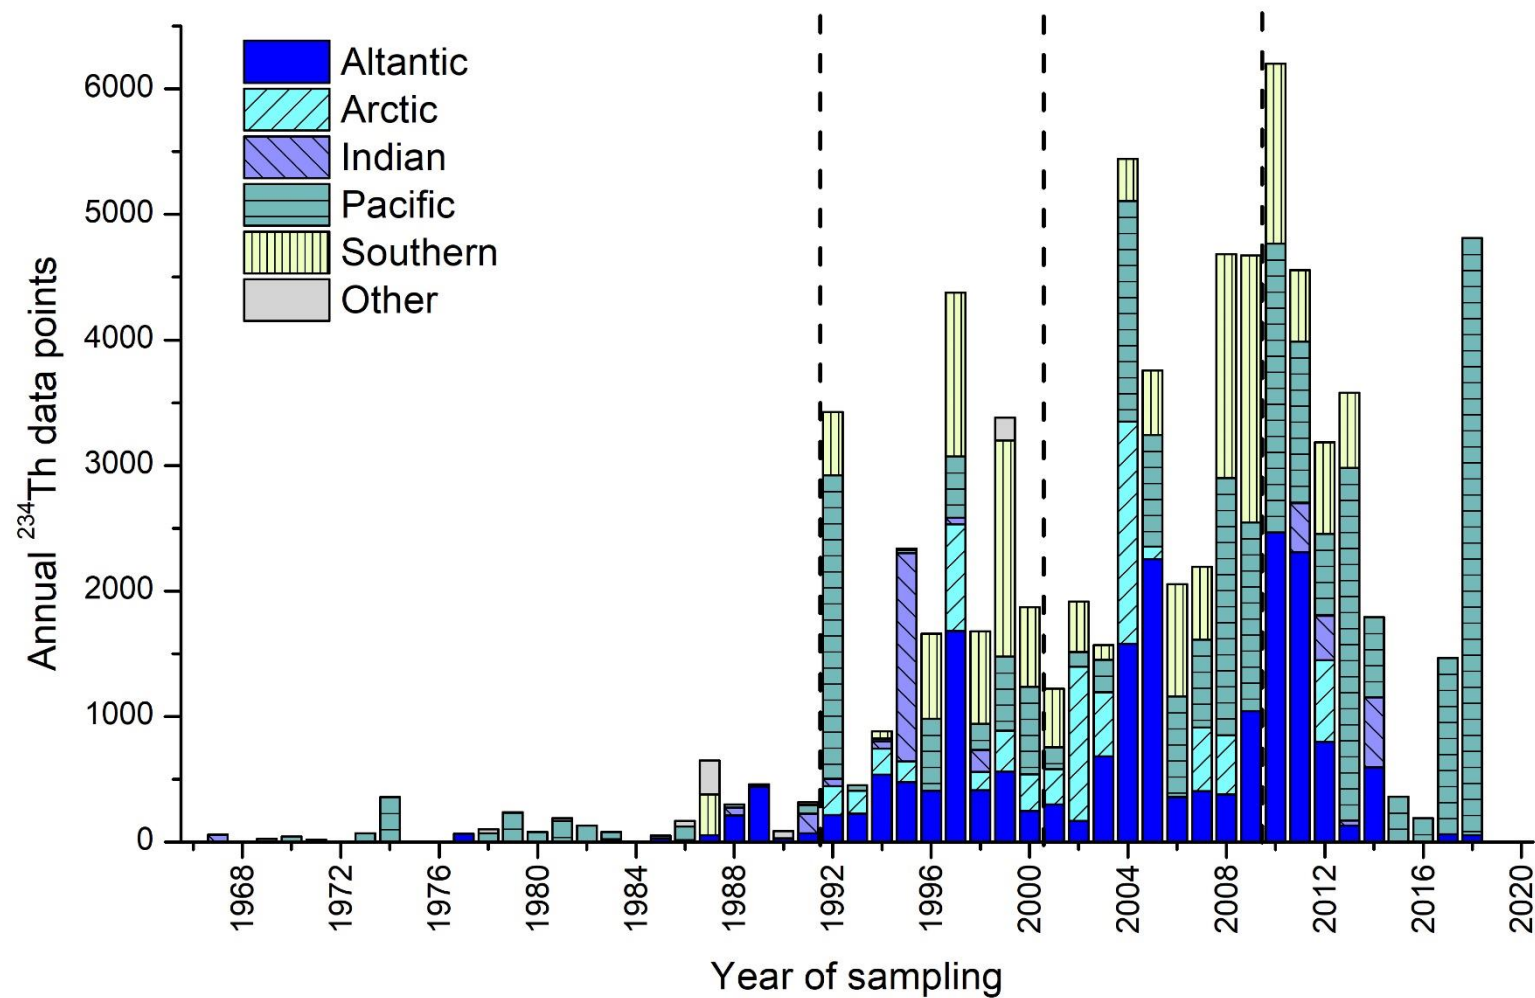

Figure S3 General view of the  $^{234}\text{Th}$  particulate data compiled sampled on either i) small (generally from 0.7-1 to 53-70  $\mu\text{m}$ ) ii) large (>53 or >70  $\mu\text{m}$ ) or iii) both size fractions.

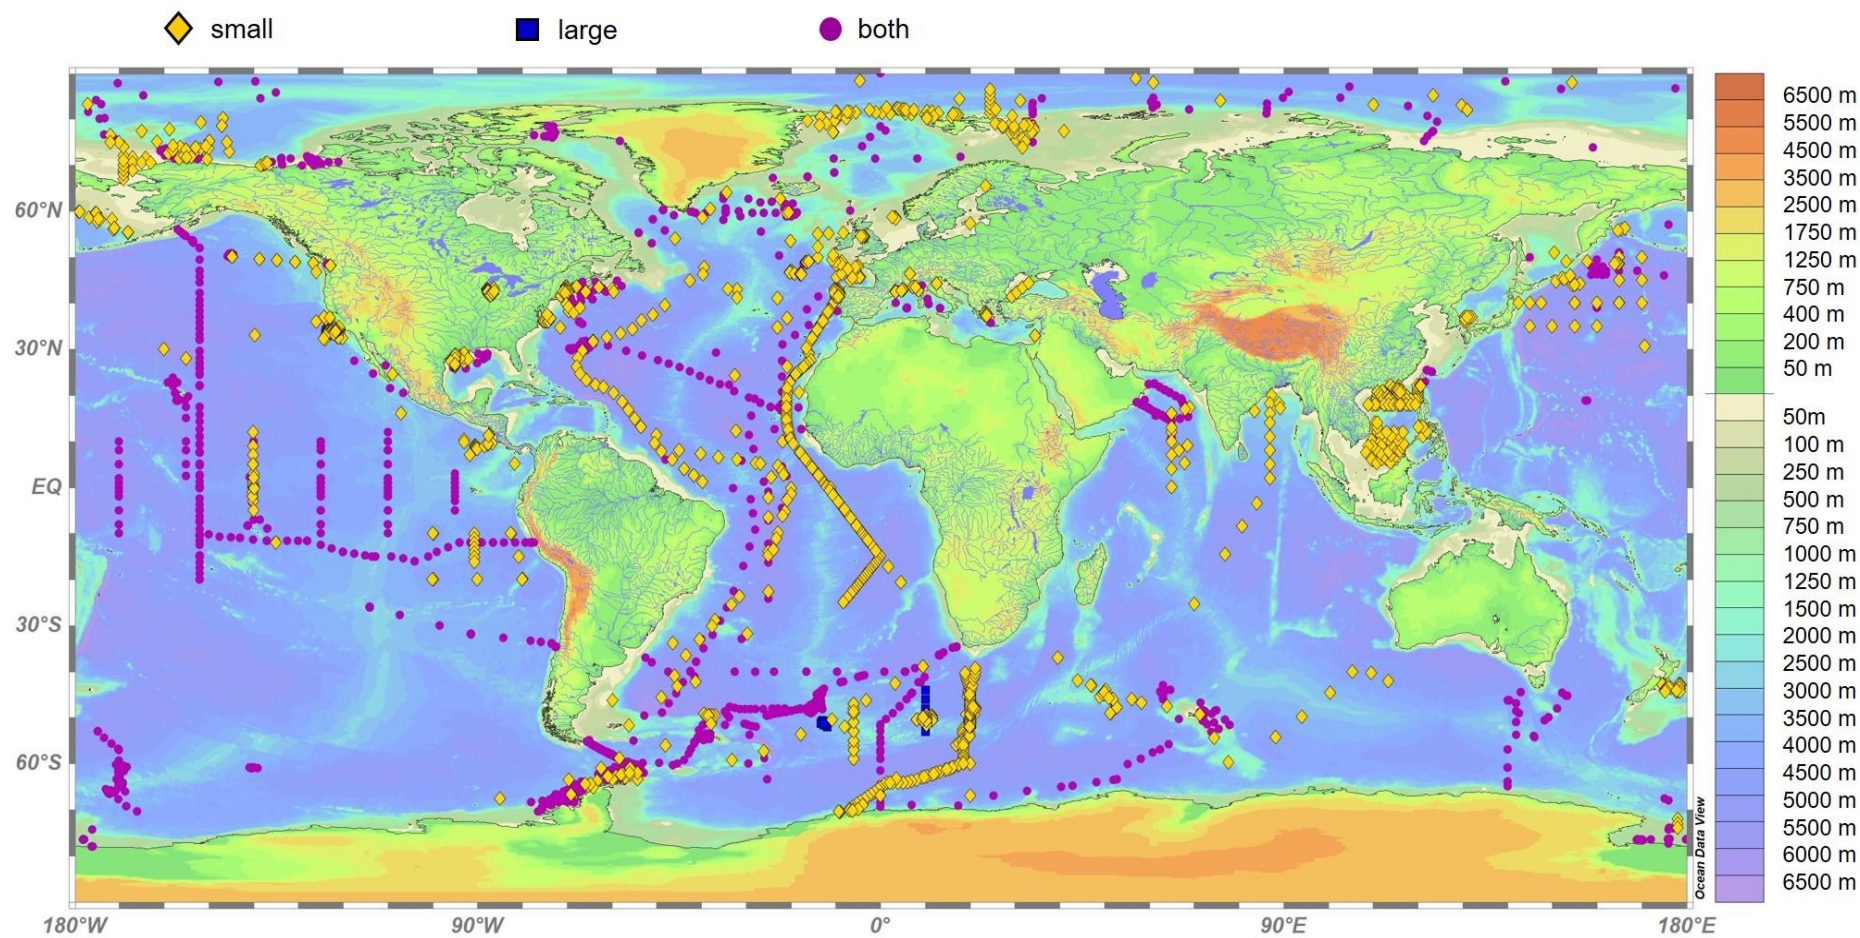



Figure S4 Overview of POC:<sup>234</sup>Th data compiled by sampling method according to i) filtration methods (i.e., bottles - Go-Flo and Niskin types -, in-situ filtration systems – e.g., MULVFS -, SPLITT (split flow-thin cell fractionation) and (large or small volume) in-situ pumps among the most common ones), ii) sediment traps, or iii) both a filtration method and sediment traps.

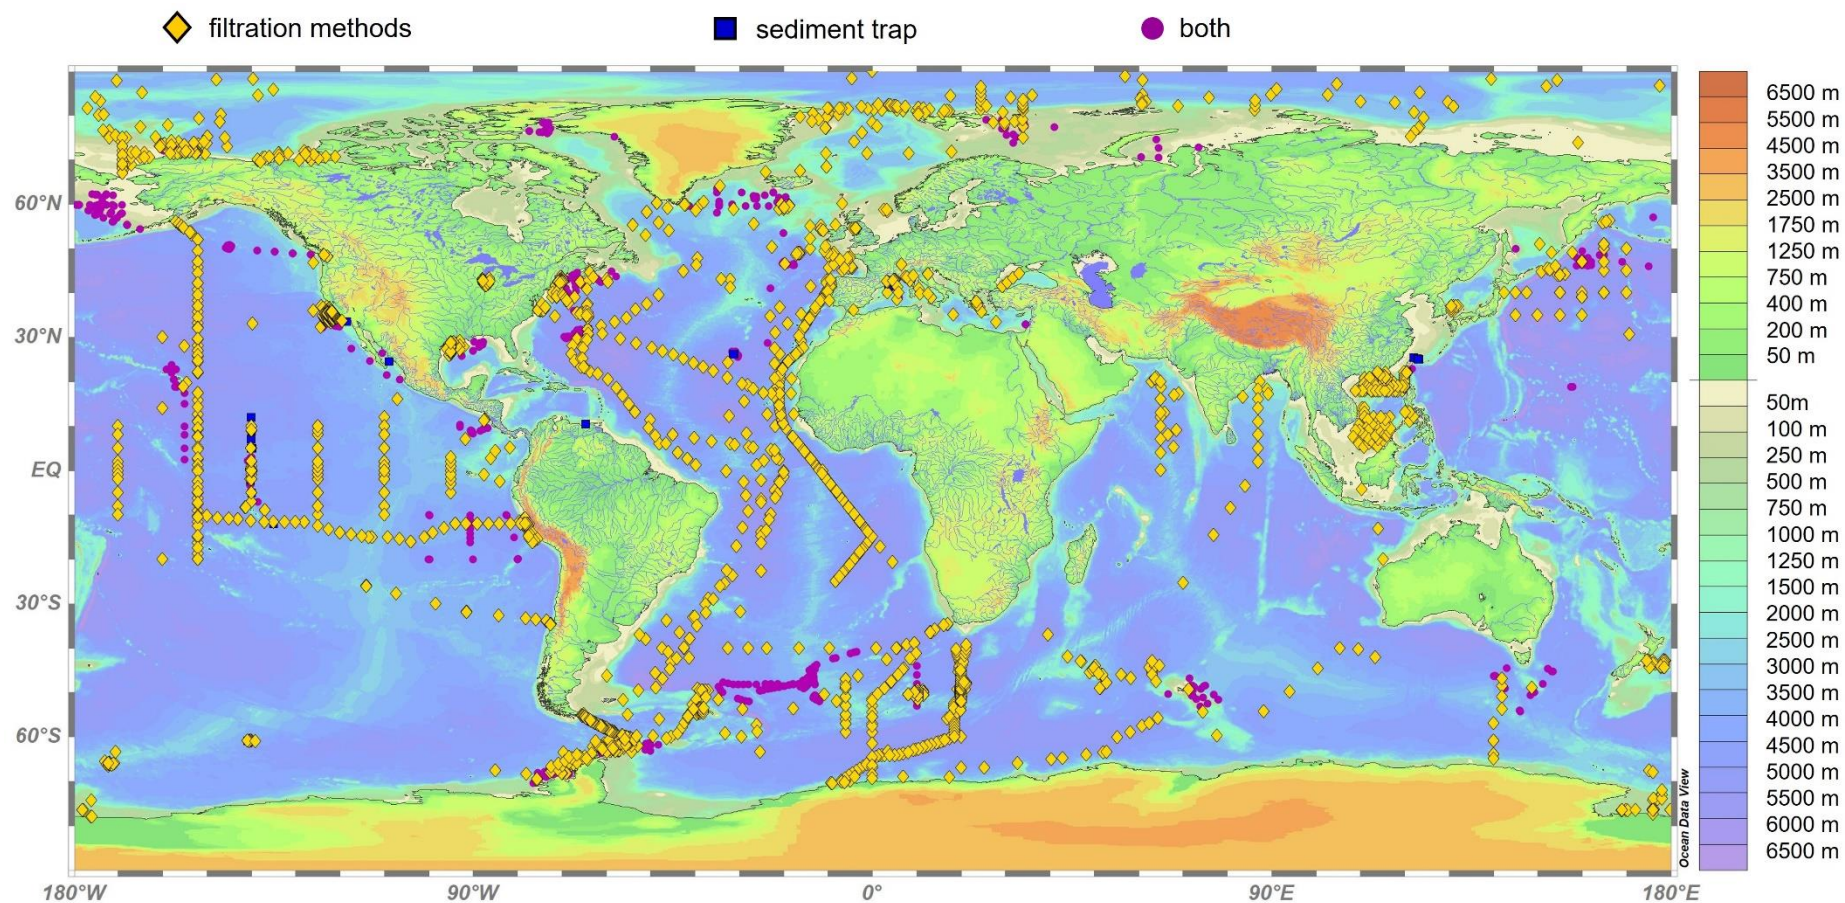

Supplement: Supplementary file 1 [file essd-2021-259-supplement.pdf]
